# Supplementary material for: Children’s Exposures to Pyrethroid Insecticides at Home: A Review of Data Collected in Published Exposure Measurement Studies Conducted in the United States
Source: MDPI journal article supplement (doi:10.3390/ijerph9082964), 2012-08-17
Supplement: s1 [file s1]

*Supplementary Information*

## **Children's Exposures to Pyrethroid Insecticides at Home: A Review of Data Collected in Published Exposure Measurement Studies Conducted in the United States**

**Marsha K. Morgan**

National Exposure Research Laboratory, U.S. EPA, Research Triangle Park, NC 27711, USA;  
E-Mail: [morgan.marsha@epa.gov](mailto:morgan.marsha@epa.gov); Tel.: +1-919-541-2598; Fax: +1-919-541-0905

---

**Table S1.** Levels of pyrethroids measured in floor dust samples (ng/g) collected at children's homes by year of study.

|                          | STUDY <sup>a,b</sup>                                              |                |            |                                                 |      |           |                                         |                 |           |                                       |      |          |                                    |      |            |                                             |      |           |
|--------------------------|-------------------------------------------------------------------|----------------|------------|-------------------------------------------------|------|-----------|-----------------------------------------|-----------------|-----------|---------------------------------------|------|----------|------------------------------------|------|------------|---------------------------------------------|------|-----------|
|                          | CTEPP-NC <sup>c</sup><br>Year = 2000–2001<br>N = 121 <sup>d</sup> |                |            | CTEPP-OH <sup>c</sup><br>Year = 2001<br>N = 119 |      |           | CTEPP-VAC<br>Year = 2000–2001<br>N = 85 |                 |           | CHAMACOS-QEA<br>Year = 2002<br>N = 20 |      |          | HPII<br>Year = 2002–2003<br>N = 35 |      |            | PDLHS <sup>e</sup><br>Year = 2006<br>N = 25 |      |           |
| Pyrethroid               | % <sup>f</sup>                                                    | 50th           | Range      | %                                               | 50th | Range     | %                                       | 50th            | Range     | %                                     | 50th | Range    | %                                  | 50th | Range      | %                                           | 50th | Range     |
| Allethrin <sup>g</sup>   | --- <sup>h</sup>                                                  | ---            | ---        | ---                                             | ---  | ---       | 8                                       | <               | ND-5,862  | ---                                   | ---  | ---      | ---                                | ---  | ---        | 80                                          | 51   | ND-289    |
| <i>cis</i> -Allethrin    | ---                                                               | ---            | ---        | ---                                             | ---  | ---       | ---                                     | ---             | ---       | 25                                    | <    | ND-2,500 | ---                                | ---  | ---        | ---                                         | ---  | ---       |
| <i>trans</i> -Allethrin  | ---                                                               | ---            | ---        | ---                                             | ---  | ---       | ---                                     | ---             | ---       | 25                                    | <    | ND-2,800 | ---                                | ---  | ---        | ---                                         | ---  | ---       |
| Bifenthrin               | ---                                                               | ---            | ---        | ---                                             | ---  | ---       | ---                                     | ---             | ---       | 5                                     | <    | ND-30    | 3                                  | <    | ND-10      | 44                                          | <    | ND-2,120  |
| Cyfluthrin               | 48                                                                | < <sup>i</sup> | ND-4,100   | 74                                              | 195  | ND-3,040  | 20                                      | <               | ND-24,607 | 10                                    | <    | ND-300   | 43                                 | <    | ND-48,100  | ---                                         | ---  | ---       |
| $\lambda$ -Cyhalothrin   | ---                                                               | ---            | ---        | ---                                             | ---  | ---       | 7                                       | <               | ND-219    | 20                                    | <    | ND-140   | 3                                  | <    | ND-100     | ---                                         | ---  | ---       |
| Cypermethrin             | ---                                                               | ---            | ---        | ---                                             | ---  | ---       | 29                                      | <               | ND-6,492  | 40                                    | 100  | ND-1,500 | 60                                 | 300  | ND-5,200   | 64                                          | 587  | ND-13,100 |
| Deltamethrin             | ---                                                               | ---            | ---        | ---                                             | ---  | ---       | 4                                       | <               | ND-2,503  | 5                                     | <    | ND-560   | 9                                  | <    | ND-7,000   | 12                                          | <    | ND-16,300 |
| Esfenvalerate            | ---                                                               | ---            | ---        | ---                                             | ---  | ---       | 7                                       | <               | ND-943    | 5                                     | <    | ND-50    | 29                                 | <    | ND-1,200   | 0                                           | NA   | NA        |
| Fenprothrin              | ---                                                               | ---            | ---        | ---                                             | ---  | ---       | 0                                       | NA <sup>j</sup> | NA        | ---                                   | ---  | ---      | ---                                | ---  | ---        | ---                                         | ---  | ---       |
| Imiprothrin              | ---                                                               | ---            | ---        | ---                                             | ---  | ---       | 4                                       | <               | ND-381    | ---                                   | ---  | ---      | ---                                | ---  | ---        | 4                                           | <    | ND-160    |
| Permethrin <sup>g</sup>  | ---                                                               | ---            | ---        | ---                                             | ---  | ---       | ---                                     | ---             | ---       | ---                                   | ---  | ---      | 100                                | 920  | 100-13,100 | ---                                         | ---  | ---       |
| <i>cis</i> -Permethrin   | 100                                                               | 804            | ND-311,000 | 100                                             | 470  | 17-79,600 | 85                                      | 666             | 26-30,553 | 100                                   | 150  | 13-2,900 | ---                                | ---  | ---        | 100                                         | 291  | 12-26,700 |
| <i>trans</i> -Permethrin | 100                                                               | 629            | ND-322,000 | 100                                             | 344  | 17-78,800 | 85                                      | 711             | ND-30,420 | 100                                   | 230  | 22-5,800 | ---                                | ---  | ---        | 100                                         | 504  | 18-46,800 |
| Phenothrin               | ---                                                               | ---            | ---        | ---                                             | ---  | ---       | 36                                      | <               | ND-42,211 | 20                                    | <    | ND-5,500 | 3                                  | <    | ND-100     | 8                                           | <    | ND-116    |
| Prallethrin              | ---                                                               | ---            | ---        | ---                                             | ---  | ---       | 0                                       | NA              | NA        | ---                                   | ---  | ---      | ---                                | ---  | ---        | 4                                           | <    | ND-34     |
| Resmethrin               | ---                                                               | ---            | ---        | ---                                             | ---  | ---       | 0                                       | NA              | NA        | 0                                     | NA   | NA       | 0                                  | NA   | NA         | ---                                         | ---  | ---       |
| Tetramethrin             | ---                                                               | ---            | ---        | ---                                             | ---  | ---       | 10                                      | <               | ND-4,511  | 0                                     | NA   | NA       | 6                                  | <    | ND-6,000   | ---                                         | ---  | ---       |

<sup>a</sup> CHAMACOS-QEA (Center for the Health Assessment of Mothers and Children of Salinas Quantitative Exposure Assessment Study); CTEPP (Children's Total Exposure to Persistent Pesticides and Other Persistent Organic Pollutants Study, *Main Study*); CTEPP-VAC (Vacuum Cleaner Bags from CTEPP *Main Study*); HPII (Healthy Public Housing Initiative Study); and PDLHS (Pesticides in Dust in Low-Income Households from Agricultural and Urban Communities Study)

<sup>b</sup> Limits of detection: CTEPP-NC and CTEPP-OH (cyfluthrin=20 ng/g; permethrin = 2 ng/g); CTEPP-VAC (range = 1–27 ng/g), except for deltamethrin and resmethrin, (60 ng/g each); CHAMACOS-QEA (range = 1–10 ng/g), except for cyfluthrin, cypermethrin, and deltamethrin (200 ng/g each); HPII (range = 2–22 ng/g), except for esfenvalerate (50 ng/g) and deltamethrin (500 ng/g); PDLHS (range = 2–20 ng/g, except for deltamethrin (250 ng/g), esfenvalerate (50 ng/g), and imiprothrin (50 ng/g))

<sup>c</sup> Data presented by state (CTEPP-NC and CTEPP-OH)

<sup>d</sup> Sample-level

<sup>e</sup> Data reported for dust collected at urban homes, only

<sup>f</sup> Percentage of samples above the detection limit

<sup>g</sup> Reported as the sum of the *cis*- and *trans*-isomers

<sup>h</sup> '---' = pyrethroid not measured

<sup>i</sup> '<' or ND = not detectable

<sup>j</sup> NA = not applicable

**Table S2.** Levels of pyrethroids measured in floor wipe samples (ng/cm<sup>2</sup>) collected at children's homes by year of study.

|                          | STUDY <sup>a,b</sup>                                            |                |         |                                              |      |         |                                            |                 |                       |                                        |      |          |                                     |      |         |                                                |      |          |
|--------------------------|-----------------------------------------------------------------|----------------|---------|----------------------------------------------|------|---------|--------------------------------------------|-----------------|-----------------------|----------------------------------------|------|----------|-------------------------------------|------|---------|------------------------------------------------|------|----------|
|                          | CTEPP-NC <sup>c</sup><br>Years = 2000–2001<br>N=28 <sup>d</sup> |                |         | CTEPP-OH <sup>c</sup><br>Year = 2001<br>N=21 |      |         | JAX-EXP <sup>e</sup><br>Year = 2001<br>N=9 |                 |                       | CFW <sup>f</sup><br>Year= 2001<br>N=41 |      |          | CHAMACOS-QEA<br>Year = 2002<br>N=20 |      |         | HPHI <sup>g</sup><br>Years = 2002–2003<br>N=30 |      |          |
| Pyrethroid               | % <sup>h</sup>                                                  | 50th           | Range   | %                                            | 50th | Range   | %                                          | 50th            | Range                 | %                                      | 50th | Range    | %                                   | 50th | Range   | %                                              | 50th | Range    |
| <i>cis</i> -Allethrin    | --- <sup>i</sup>                                                | ---            | ---     | ---                                          | ---  | ---     | 33                                         | <               | NR <sup>m</sup> –0.11 | ---                                    | ---  | ---      | 20                                  | <    | ND–2    | ---                                            | ---  | ---      |
| <i>trans</i> -Allethrin  | ---                                                             | ---            | ---     | ---                                          | ---  | ---     | 33                                         | <               | NR–0.05               | ---                                    | ---  | ---      | 20                                  | <    | ND–2.2  | ---                                            | ---  | ---      |
| Bifenthrin               | ---                                                             | ---            | ---     | ---                                          | ---  | ---     | 22                                         | <               | NR–0.05               | ---                                    | ---  | ---      | 5                                   | <    | ND–0.04 | 3                                              | <    | ND–0.01  |
| Cyfluthrin               | 7                                                               | < <sup>j</sup> | ND–0.13 | 10                                           | <    | ND–0.08 | 11                                         | <               | NR–3.4                | ---                                    | ---  | ---      | 5                                   | <    | ND–0.4  | 43                                             | 0.37 | 0.01–5.7 |
| λ-Cyhalothrin            | ---                                                             | ---            | ---     | ---                                          | ---  | ---     | 11                                         | <               | NR–0.12               | ---                                    | ---  | ---      | 5                                   | <    | ND–0.03 | 23                                             | 0.17 | 0.02–0.8 |
| Cypermethrin             | ---                                                             | ---            | ---     | ---                                          | ---  | ---     | 67                                         | 0.7             | NR–18                 | ---                                    | ---  | ---      | 40                                  | <    | ND–2.8  | 63                                             | 0.38 | 0.06–6.3 |
| Deltamethrin             | ---                                                             | ---            | ---     | ---                                          | ---  | ---     | 0                                          | NA <sup>1</sup> | NA                    | ---                                    | ---  | ---      | 0                                   | NA   | NA      | 7                                              | 0.34 | 0.2–0.5  |
| Esfenvalerate            | ---                                                             | ---            | ---     | ---                                          | ---  | ---     | 0                                          | NA              | NA                    | 12                                     | NR   | 0.48-9.4 | 0                                   | NA   | NA      | 50                                             | 0.1  | 0.02–2.7 |
| Permethrin <sup>k</sup>  | ---                                                             | ---            | ---     | ---                                          | ---  | ---     | ---                                        | ---             | ---                   | ---                                    | ---  | ---      | ---                                 | ---  | ---     | 93                                             | 0.60 | 0.07–7.5 |
| <i>cis</i> -Permethrin   | 93                                                              | 0.04           | ND–0.87 | 71                                           | 0.01 | ND–5.2  | 67                                         | 0.04            | NR–9.8                | 66                                     | NR   | 0.14-32  | 85                                  | 0.10 | ND–1.7  | ---                                            | ---  | ---      |
| <i>trans</i> -Permethrin | 93                                                              | 0.04           | ND–1.0  | 71                                           | 0.01 | ND–5.2  | 78                                         | 0.05            | NR–14                 | 93                                     | NR   | 0.08-49  | 95                                  | 0.23 | ND–3.6  | ---                                            | ---  | ---      |
| Phenothrin               | ---                                                             | ---            | ---     | ---                                          | ---  | ---     | 33                                         | <               | NR–1.4                | ---                                    | ---  | ---      | 15                                  | <    | ND–3.5  | 3                                              | <    | ND–0.04  |
| Resmethrin               | ---                                                             | ---            | ---     | ---                                          | ---  | ---     | ---                                        | ---             | ---                   | ---                                    | ---  | ---      | 0                                   | NA   | NA      | 3                                              | <    | ND–0.01  |
| Tetramethrin             | ---                                                             | ---            | ---     | ---                                          | ---  | ---     | 33                                         | <               | NR–0.28               | ---                                    | ---  | ---      | 0                                   | NA   | NA      | 10                                             | 0.82 | 0.01–0.9 |

<sup>a</sup> CHAMACOS-QEA (Center for the Health Assessment of Mothers and Children of Salinas Quantitative Exposure Assessment Study); CFW (Children of Farm workers Study); CTEPP (Children's Total Exposure to Persistent Pesticides and Other Persistent Organic Pollutants Study), HPHI (Healthy Public Housing Initiative Study); and JAX-EXP (Biological and Environmental Monitoring for Organophosphate and Pyrethroid Pesticide Exposures in Children Living in Jacksonville, Florida Study)

<sup>b</sup> Limits of detection: CTEPP-NC and CTEPP-OH (cyfluthrin=0.007 ng/cm<sup>2</sup>; permethrin= 0.001 ng/cm<sup>2</sup>); JAX-EXP (range = 0.005-0.016 ng/cm<sup>2</sup>); CFW (range 0.005 to 0.03 ng/cm<sup>2</sup>); CHAMACOS-QEA (range = 0.0001-0.001 ng/cm<sup>2</sup>, except for cyfluthrin and cypermethrin (0.025 ng/cm<sup>2</sup>) and deltamethrin (0.020 ng/cm<sup>2</sup>); HPHI (range = 0.001-0.027 ng/cm<sup>2</sup>), except for deltamethrin (0.27 ng/cm<sup>2</sup>)

<sup>c</sup> Data presented by state (CTEPP-NC and CTEPP-OH)

<sup>d</sup> Sample-level

<sup>e</sup> Data reported for wipes collected in child's main play area inside home

<sup>f</sup> Median values not reported; mean±standard deviation values for *cis*- and *trans*-permethrin were 3.1±6.6 ng/cm<sup>2</sup> and 3.4±8.6 ng/cm<sup>2</sup>, respectively

<sup>g</sup> Data reported for floor wipes collected in living room

<sup>h</sup> Percentage of samples above the detection limit

<sup>i</sup> '---' = pyrethroid not measured

<sup>j</sup> '<' or ND = not detectable

<sup>k</sup> Reported as the sum of the *cis*- and *trans*-isomers

<sup>1</sup> NA = not applicable

<sup>m</sup> NR = minimum value was not reported

**Table S3.** Levels of pyrethroids measured in children's duplicate diet solid food samples (ng/g) by year of study.

|                          | STUDY <sup>a,b,c</sup>                                           |                |        |                                               |      |        |                               |                 |                      |                                     |      |       |                                                     |      |          |                                                    |      |          |
|--------------------------|------------------------------------------------------------------|----------------|--------|-----------------------------------------------|------|--------|-------------------------------|-----------------|----------------------|-------------------------------------|------|-------|-----------------------------------------------------|------|----------|----------------------------------------------------|------|----------|
|                          | CTEPP-NC <sup>d</sup><br>Years = 2000–2001<br>N=128 <sup>e</sup> |                |        | CTEPP-OH <sup>d</sup><br>Year = 2001<br>N=125 |      |        | JAX-EXP<br>Year = 2001<br>N=9 |                 |                      | CHAMACOS-QEA<br>Year = 2002<br>N=20 |      |       | PEPCOT-O <sup>e</sup><br>Years = 2003–2005<br>N=142 |      |          | PEPCOT-Y <sup>f</sup><br>Years =2003–2005<br>N=136 |      |          |
| Pyrethroid               | % <sup>g</sup>                                                   | 50th           | Range  | %                                             | 50th | Range  | %                             | 50th            | Range                | %                                   | 50th | Range | %                                                   | 50th | Range    | %                                                  | 50th | Range    |
| <i>cis</i> -Allethrin    | ---                                                              | ---            | ---    | ---                                           | ---  | ---    | 0                             | NA <sup>j</sup> | NA                   | ---                                 | ---  | ---   | ---                                                 | ---  | ---      | ---                                                | ---  | ---      |
| <i>trans</i> -Allethrin  | ---                                                              | ---            | ---    | ---                                           | ---  | ---    | 0                             | NA              | NA                   | ---                                 | ---  | ---   | ---                                                 | ---  | ---      | ---                                                | ---  | ---      |
| Bifenthrin               | ---                                                              | ---            | ---    | ---                                           | ---  | ---    | 33                            | <               | NR <sup>k</sup> -1.3 | ---                                 | ---  | ---   | <20 <sup>l</sup>                                    | NR   | NR       | <20                                                | NR   | NR       |
| Cyfluthrin               | 6                                                                | < <sup>i</sup> | ND-4.7 | 3                                             | <    | ND-22  | 22                            | <               | NR-3.6               | ---                                 | ---  | ---   | <20                                                 | NR   | NR       | <20                                                | NR   | NR       |
| $\lambda$ -Cyhalothrin   | ---                                                              | ---            | ---    | ---                                           | ---  | ---    | 0                             | NA              | NA                   | ---                                 | ---  | ---   | <20                                                 | NR   | NR       | <20                                                | NR   | NR       |
| Cypermethrin             | ---                                                              | ---            | ---    | ---                                           | ---  | ---    | 67                            | 2.3             | NR-9.5               | ---                                 | ---  | ---   | <20                                                 | NR   | NR       | <20                                                | NR   | NR       |
| Deltamethrin             | ---                                                              | ---            | ---    | ---                                           | ---  | ---    | 11                            | <               | NR-13                | ---                                 | ---  | ---   | <20                                                 | NR   | NR       | <20                                                | NR   | NR       |
| Esfenvalerate            | ---                                                              | ---            | ---    | ---                                           | ---  | ---    | 0                             | NA              | NA                   | ---                                 | ---  | ---   | <20                                                 | NR   | NR       | <20                                                | NR   | NR       |
| Fenpropathrin            | ---                                                              | ---            | ---    | ---                                           | ---  | ---    | ---                           | ---             | ---                  | ---                                 | ---  | ---   | <20                                                 | NR   | NR       | <20                                                | NR   | NR       |
| Fenvalerate              | ---                                                              | ---            | ---    | ---                                           | ---  | ---    | ---                           | ---             | ---                  | ---                                 | ---  | ---   | <20                                                 | NR   | NR       | <20                                                | NR   | NR       |
| <i>cis</i> -Permethrin   | 46                                                               | <              | ND-81  | 31                                            | <    | ND-560 | 78                            | 0.29            | NR-13                | 0                                   | NA   | NA    | >50                                                 | 0.15 | 0.04-4.4 | >50                                                | 0.10 | 0.04-4.1 |
| <i>trans</i> -Permethrin | 46                                                               | <              | ND-70  | 31                                            | <    | ND-448 | 78                            | 0.22            | NR-22                | 0                                   | NA   | NA    | >50                                                 | 0.14 | 0.04-6.2 | >50                                                | 0.09 | 0.04-4.1 |
| Phenothrin               | ---                                                              | ---            | ---    | ---                                           | ---  | ---    | 11                            | <               | NR-0.11              | ---                                 | ---  | ---   | <20                                                 | NR   | NR       | <20                                                | NR   | NR       |
| Resmethrin               | ---                                                              | ---            | ---    | ---                                           | ---  | ---    | ---                           | ---             | ---                  | ---                                 | ---  | ---   | <20                                                 | NR   | NR       | <20                                                | NR   | NR       |
| Tetramethrin             | ---                                                              | ---            | ---    | ---                                           | ---  | ---    | 22                            | <               | NR-0.13              | ---                                 | ---  | ---   | <20                                                 | NR   | NR       | <20                                                | NR   | NR       |

<sup>a</sup> CHAMACOS-QEA (Center for the Health Assessment of Mothers and Children of Salinas Quantitative Exposure Assessment Study); CTEPP (Children's Total Exposure to Persistent Pesticides and Other Persistent Organic Pollutants Study), JAX-EXP (Biological and Environmental Monitoring for Organophosphate and Pyrethroid Pesticide Exposures in Children Living in Jacksonville, Florida Study), and PEPCOT (The Pesticide Exposures of Preschool Children Over Time Study).

<sup>b</sup> Limits of detection: CTEPP-NC and CTEPP-OH (cyfluthrin = 0.83 ng/g; permethrin = 0.08 ng/g); CHAMACOS-QEA (permethrin = 4.5 ng/g); JAX-EXP (range = 0.02–0.4 ng/g); PEPCOT (range = 0.1–0.5 ng/g)

<sup>c</sup> Only CTEPP-NC, CTEPP-OH, and CHAMCOS-QEA studies quantified the levels of pyrethroids (permethrin and/or cyfluthrin) in liquid food samples; these pyrethroids were detected in less than 20% of these samples

<sup>d</sup> Data presented by state (CTEPP-NC and CTEPP-OH)

<sup>e</sup> Sample-level

<sup>f</sup> Data presented for older sibling (PEPCOT-O) and younger sibling (PEPCOT-Y) from the same household. Data summarized over the three year collection period (2003–2005)

<sup>g</sup> Percentage of samples above the detection limit

<sup>h</sup> '---' = pyrethroid not measured

<sup>i</sup> '<' or ND = not detectable

<sup>j</sup> NA = not applicable

<sup>k</sup> NR = minimum value was not reported.

<sup>l</sup> Frequencies of detection were reported to be generally <20% for all measured pyrethroids (individual data not reported), except for permethrin (Chuang and Wilson [20])

**Table S4.** Levels of pyrethroids measured in indoor air samples (ng/m<sup>3</sup>) collected from children's homes by year of study.

|                          | STUDY <sup>a,b,c</sup>                                           |                |        |                                               |      |        |                               |                 |                     |                                     |      |        |
|--------------------------|------------------------------------------------------------------|----------------|--------|-----------------------------------------------|------|--------|-------------------------------|-----------------|---------------------|-------------------------------------|------|--------|
|                          | CTEPP-NC <sup>d</sup><br>Years = 2000–2001<br>N=128 <sup>e</sup> |                |        | CTEPP-OH <sup>d</sup><br>Year = 2001<br>N=125 |      |        | JAX-EXP<br>Year = 2001<br>N=9 |                 |                     | CHAMACOS-QEA<br>Year = 2002<br>N=20 |      |        |
| Pyrethroid               | % <sup>f</sup>                                                   | 50th           | Range  | %                                             | 50th | Range  | %                             | 50th            | Range               | %                                   | 50th | Range  |
| <i>cis</i> -Allethrin    | --- <sup>g</sup>                                                 | ---            | ---    | ---                                           | ---  | ---    | 33                            | <               | NR <sup>j</sup> -74 | 15                                  | <    | ND-63  |
| <i>trans</i> -Allethrin  | ---                                                              | ---            | ---    | ---                                           | ---  | ---    | 33                            | <               | NR-38               | 15                                  | <    | ND-61  |
| Bifenthrin               | ---                                                              | ---            | ---    | ---                                           | ---  | ---    | 11                            | <               | NR-3.0              | 5                                   | <    | ND-3.1 |
| Cyfluthrin               | 4                                                                | < <sup>h</sup> | ND-183 | 2                                             | <    | ND-9.4 | 11                            | <               | NR-5.5              | 0                                   | NA   | NA     |
| $\lambda$ -Cyhalothrin   | ---                                                              | ---            | ---    | ---                                           | ---  | ---    | 0                             | NA <sup>i</sup> | NA                  | 0                                   | NA   | NA     |
| Cypermethrin             | ---                                                              | ---            | ---    | ---                                           | ---  | ---    | 22                            | <               | NR-100              | 5                                   | <    | ND-380 |
| Deltamethrin             | ---                                                              | ---            | ---    | ---                                           | ---  | ---    | 0                             | NA              | NA                  | 0                                   | NA   | NA     |
| Esfenvalerate            | ---                                                              | ---            | ---    | ---                                           | ---  | ---    | 0                             | NA              | NA                  | 0                                   | NA   | NA     |
| <i>cis</i> -Permethrin   | 66                                                               | 0.58           | ND-34  | 22                                            | <    | ND-5.4 | 89                            | 2.0             | NR-92               | 40                                  | <    | ND-8.2 |
| <i>trans</i> -Permethrin | 66                                                               | 0.36           | ND-41  | 18                                            | <    | ND-6.8 | 89                            | 3.1             | NR-130              | 16                                  | <    | ND-11  |
| Phenothrin               | ---                                                              | ---            | ---    | ---                                           | ---  | ---    | 11                            | <               | NR-4.2              | 10                                  | <    | ND-96  |
| Resmethrin               | ---                                                              | ---            | ---    | ---                                           | ---  | ---    | ---                           | ---             | ---                 | 0                                   | NA   | NA     |
| Tetramethrin             | ---                                                              | ---            | ---    | ---                                           | ---  | ---    | 22                            | 0.15            | NR-63               | 0                                   | NA   | NA     |

<sup>a</sup> CHAMACOS-QEA (Center for the Health Assessment of Mothers and Children of Salinas Quantitative Exposure Assessment Study); CTEPP (Children's Total Exposure to Persistent Pesticides and Other Persistent Organic Pollutants Study), and JAX-EXP (Biological and Environmental Monitoring for Organophosphate and Pyrethroid Pesticide Exposures in Children Living in Jacksonville, Florida Study)

<sup>b</sup> Limits of detection: CTEPP-NC and CTEPP-OH (cyfluthrin=0.9 ng/m<sup>3</sup>; permethrin= 0.09 ng/m<sup>3</sup> (NC) and 0.3 ng/cm<sup>3</sup> (OH)); JAX-EXP(range 0.4-3.0 ng/m<sup>3</sup>); CHAMACOS-QEA (range 0.28-1.11 ng/m<sup>3</sup>), except for cyfluthrin and cypermethrin (27.8 ng/m<sup>3</sup>), deltamethrin(13.9 ng/m<sup>3</sup>), and esfenvalerate (6.9 ng/m<sup>3</sup>)

<sup>c</sup> All studies collected outdoor air samples. The percentage of detected pyrethroids were < 31% in the outdoor air samples except for JAX-EXP. For JAX-EXP, *cis*- and *trans*-permethrin were both detected in 100% of the nine air samples; median concentrations were 2.1 and 2.5 ng/m<sup>3</sup>, respectively

<sup>d</sup> Data presented by state (CTEPP-NC and CTEPP-OH)

<sup>e</sup> Sample-level

<sup>f</sup> Percentage of samples above the detection limit

<sup>g</sup> '---' = pyrethroid not measured

<sup>h</sup> '<' or ND = not detectable

<sup>i</sup> NA = not applicable

<sup>j</sup> NR = minimum value was not reported.
